# Supplementary material for: Exploring the hidden potential of a benzothiazole-based Schiff-base exhibiting AIE and ESIPT and its activity in pH sensing, intracellular imaging and ultrasensitive & selective detection of aluminium (Al3+)
Source: Royal Society of Chemistry journal article supplement (doi:10.1039/c8an00349a), 2018-01-01
Supplement: c8an00349a1.pdf [file c8an00349a1.pdf]

Exploring the Hidden Potential of Benzothiazole Based Schiff base “AIE and ESIPT” active for pH Sensing, Intracellular Imaging and Ultrasensitive & Selective detection of Aluminium ( $Al^{3+}$ ).

Vishal Kachwal<sup>1</sup>, I. S Vamsi Krishna<sup>1</sup>, Leena Fageria<sup>2</sup>, Jagrity Chaudhary<sup>1</sup>, Ram Kinkar Roy<sup>1\*</sup>, Rajdeep Chowdhury<sup>2\*</sup>, Inamur Rahaman Laskar<sup>1\*</sup>

<sup>1</sup>Department of Chemistry, BITS Pilani, Pilani Campus, Rajasthan 333031, India (Email: [ir\\_laskar@pilani.bits-pilani.ac.in](mailto:ir_laskar@pilani.bits-pilani.ac.in); [rkroy@pilani.bits-pilani.ac.in](mailto:rkroy@pilani.bits-pilani.ac.in)); <sup>2</sup>Department of Biological Sciences, BITS Pilani, Pilani Campus, Rajasthan 333031, India (Email:

[rajdeep.chowdhury@pilani.bits-pilani.ac.in](mailto:rajdeep.chowdhury@pilani.bits-pilani.ac.in))

## Characterization of organic molecule (OM)

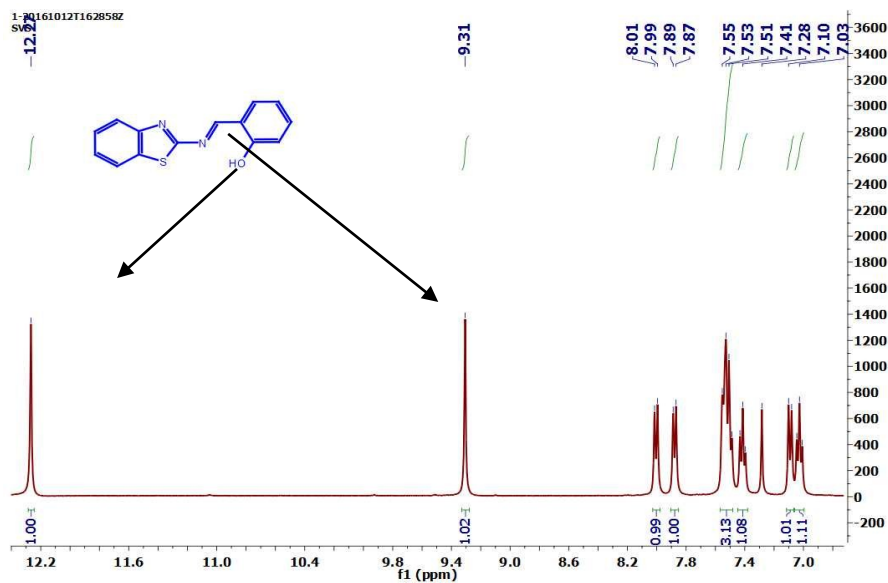

<sup>1</sup>H NMR of Ligand ( OM)

a) <sup>1</sup>H (400 MHz, CDCl<sub>3</sub>) 12.27 (1 H, s), 9.31 (1 H, s), 8.00 (1 H, d, *J* 8.0), 7.88 (1 H, d, *J* 7.9), 7.52 (3 H, dd, *J* 17.2, 8.9), 7.41 (1 H, t, *J* 7.5), 7.28 (1 H, s), 7.09 (1 H, d, *J* 8.3), 7.03 (1 H, t, *J* 7.4).

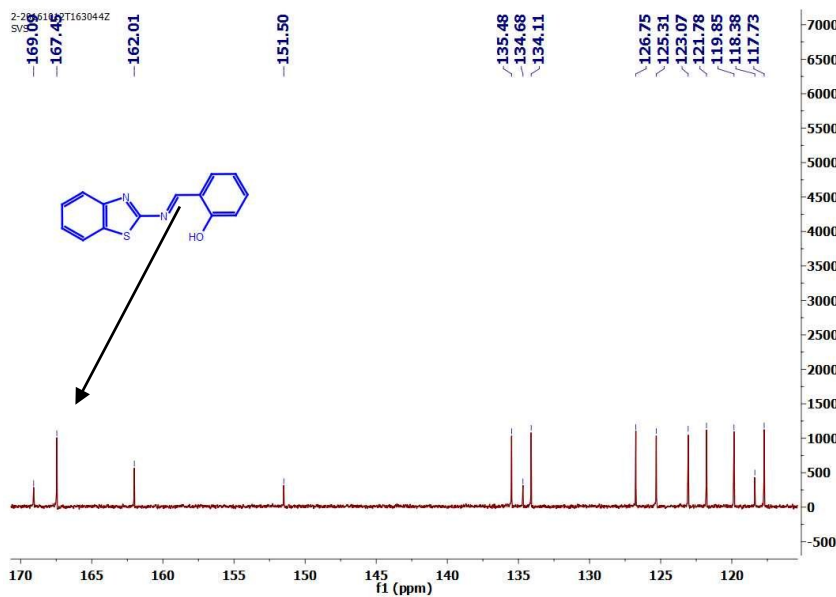

b) <sup>13</sup>C (101 MHz, CDCl<sub>3</sub>) 169.09, 167.45, 162.01, 151.50, 135.48, 134.68, 134.11, 126.75, 125.31, 123.07, 121.78, 119.85, 118.38, 117.73.

Fig.S1 <sup>1</sup>H and <sup>13</sup>C NMR of Organic molecule Compound

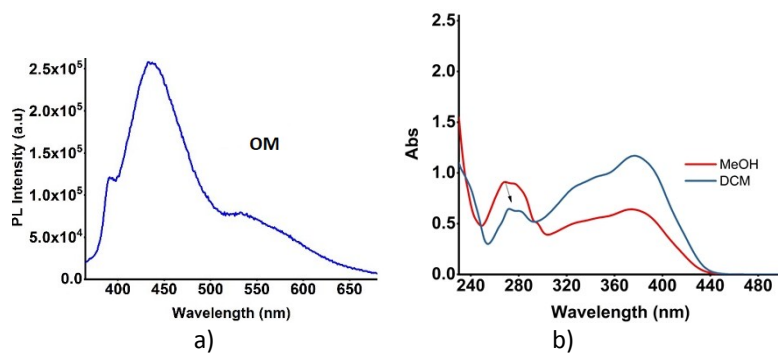

**Fig. S2** a) Emission spectrum of organic molecule in methanol ( $10^{-4}$ M), b) Absorbance spectra of the organic molecule ( $10^{-4}$  M)  $\lambda_{\text{max}} = 275$  &  $370$  nm

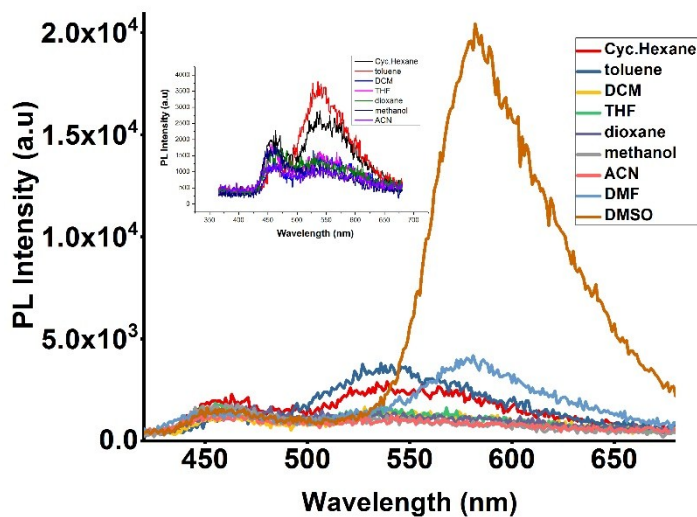

**Fig. S3.** Emission spectra of Compound in different solvent ( $10^{-4}$  M)

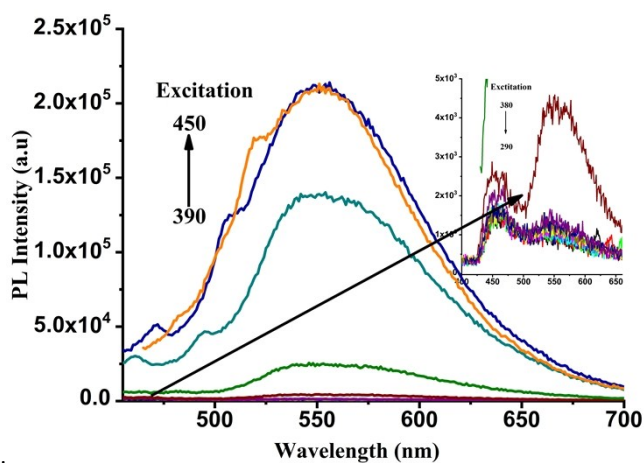

**Fig. S4** PL Intensity plot of compound in methanol ( $10^{-4}$  M)

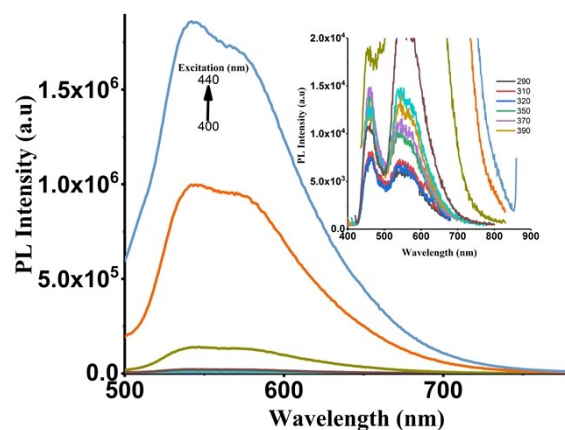

Fig. S5 PL spectra of the compound in benzene with gradual variation of excitation

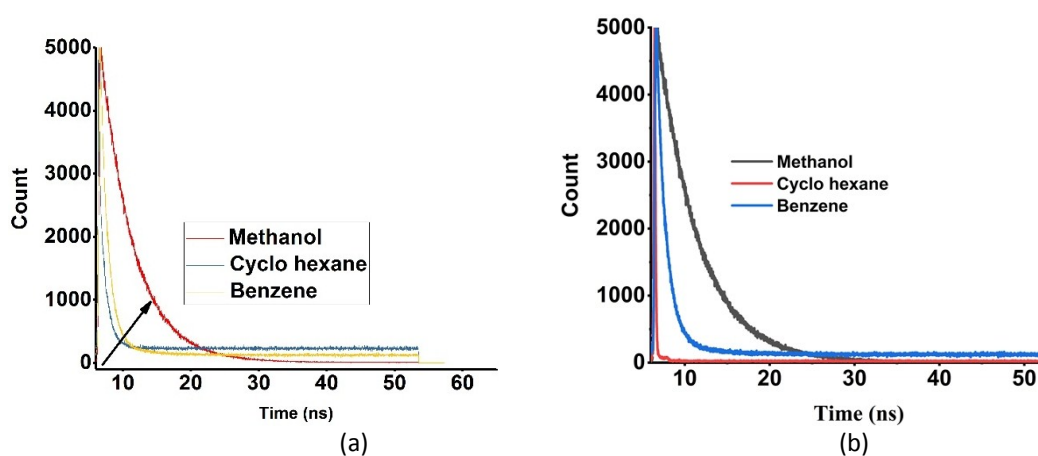

| Solvent     | Average Life time |        |         |
|-------------|-------------------|--------|---------|
|             | $\lambda_{emi}$   | 450 nm | 550nm   |
| Methanol    |                   | 0.2 ns | 0.336ns |
| Benzene     |                   | 1.16ns | 0.12ns  |
| Cyclohexane |                   | 0.09ns | 0.044ns |

(c)

**(d) Life time Decay data calculation.**

**Methanol**

At 450 (calculated using three exponential)

$T_1 = 68.10516 \text{ ch}; \quad 9.526196E^{-10} \text{ sec} \quad \text{S.Dev} = 1.432743E^{-11} \text{ sec}$   
 $T_2 = 3.070585 \text{ ch}; \quad 4.294975E^{-11} \text{ sec} \quad \text{S.Dev} = 2.680244E^{-12} \text{ sec}$   
 $T_3 = 352.8476 \text{ ch}; \quad 4.935449E^{-09} \text{ sec} \quad \text{S.Dev} = 4.245255E^{-11} \text{ sec}$   
 $A = 33.50214$   
 $B_1 = 2.654491E^{-02} [ 35.54 \text{ Rel.Ampl}][ 0.09 \text{ Alpha}] \text{ S.Dev} = 1.248183E^{-04}$   
 $B_2 = 0.2778857 [ 16.77 \text{ Rel.Ampl}][ 0.89 \text{ Alpha}] \text{ S.Dev} = 1.631801E^{-03}$   
 $B_3 = 6.874496E^{-03} [ 47.69 \text{ Rel.Ampl}][ 0.02 \text{ Alpha}] \text{ S.Dev} = 2.864137E^{-05}$

S.Dev = 0.2364001

At 550 nm (calculated using 4 exponential)

-

|    |                           |                                    |                          |     |                                  |                      |
|----|---------------------------|------------------------------------|--------------------------|-----|----------------------------------|----------------------|
| T1 | = 26.78279                | ch;                                | 3.746238E <sup>-10</sup> | sec | S.Dev = 6.154803E <sup>-11</sup> | sec                  |
| T2 | = 26.50207                | ch;                                | 3.706972E <sup>-10</sup> | sec | S.Dev = 3.015059E <sup>-11</sup> | sec                  |
| T3 | = 258.0956                | ch;                                | 3.610108E <sup>-09</sup> | sec | S.Dev = 2.693976E <sup>-10</sup> | sec                  |
| T4 | = 6.319427                | ch;                                | 8.839286E <sup>-11</sup> | sec | S.Dev = 1.380693E <sup>-12</sup> | sec                  |
| A  | = 5.948431                |                                    |                          |     |                                  | S.Dev = 7.081353E-02 |
| B1 | = 1.158852                | [ 1369.42 Rel.Ampl][ 0.43 Alpha]   |                          |     | S.Dev = 0.030549                 |                      |
| B2 | = -1.173263               | [ -1371.92 Rel.Ampl][ -0.44 Alpha] |                          |     | S.Dev = 0.0310372                |                      |
| B3 | = 4.54028E <sup>-04</sup> | [ 5.17 Rel.Ampl][ 0.00 Alpha]      |                          |     | S.Dev = 1.522398E <sup>-05</sup> |                      |
| B4 | = 0.3490632               | [ 97.33 Rel.Ampl][ 0.13 Alpha]     |                          |     | S.Dev = 1.803554E <sup>-03</sup> |                      |

### Benzene

At 450nm (Calculated using 2 exponential)

|                                                  |                            |                                |                          |     |                                  |                   |
|--------------------------------------------------|----------------------------|--------------------------------|--------------------------|-----|----------------------------------|-------------------|
| T1                                               | = 72.5144                  | ch;                            | 1.014294E <sup>-09</sup> | sec | S.Dev = 1.472608E <sup>-11</sup> | sec               |
| T2                                               | = 217.7929                 | ch;                            | 3.046374E <sup>-09</sup> | sec | S.Dev = 1.005732E <sup>-10</sup> | sec               |
| A                                                | = 130.8135                 |                                |                          |     |                                  | S.Dev = 0.5892575 |
| B1                                               | = 6.174804E <sup>-02</sup> | [ 80.13 Rel.Ampl][ 0.92 Alpha] |                          |     | S.Dev = 1.623824E <sup>-04</sup> |                   |
| B2                                               | = 0.0050996                | [ 19.87 Rel.Ampl][ 0.08 Alpha] |                          |     | S.Dev = 6.495936E <sup>-05</sup> |                   |
| Average Life Time = 1.169315E <sup>-09</sup> sec |                            |                                |                          |     |                                  |                   |

At 550nm (Calculated using 2 exponentials)

|    |                            |                                |                          |     |                                  |                   |
|----|----------------------------|--------------------------------|--------------------------|-----|----------------------------------|-------------------|
| T1 | = 7.624972                 | ch;                            | 1.066542E <sup>-10</sup> | sec | S.Dev = 1.316567E <sup>-12</sup> | sec               |
| T2 | = 63.98113                 | ch;                            | 8.949348E <sup>-10</sup> | sec | S.Dev = 1.706884E <sup>-11</sup> | sec               |
| A  | = 42.97051                 |                                |                          |     |                                  | S.Dev = 0.1169218 |
| B1 | = 0.2011084                | [ 81.44 Rel.Ampl][ 0.97 Alpha] |                          |     | S.Dev = 7.348991E <sup>-04</sup> |                   |
| B2 | = 5.463318E <sup>-03</sup> | [ 18.56 Rel.Ampl][ 0.03 Alpha] |                          |     | S.Dev = 5.905132E <sup>-05</sup> |                   |

### Cyclohexane

At 450 nm (Calculated using 2 exponentials)

|    |                            |                                |                          |     |                                  |                   |
|----|----------------------------|--------------------------------|--------------------------|-----|----------------------------------|-------------------|
| T1 | = 1.803853                 | ch;                            | 2.523136E <sup>-11</sup> | sec | S.Dev = 4.193392E <sup>-12</sup> | sec               |
| T2 | = 68.66523                 | ch;                            | 9.604536E <sup>-10</sup> | sec | S.Dev = 4.047179E <sup>-12</sup> | sec               |
| A  | = 229.8599                 |                                |                          |     |                                  | S.Dev = 0.4845997 |
| B1 | = 0.4521662                | [ 23.27 Rel.Ampl][ 0.92 Alpha] |                          |     | S.Dev = 3.080053E <sup>-03</sup> |                   |
| B2 | = 3.917591E <sup>-02</sup> | [ 76.73 Rel.Ampl][ 0.08 Alpha] |                          |     | S.Dev = 1.070743E <sup>-04</sup> |                   |

At 550 nm (Calculated using 2 exponentials)

|    |                            |                                |                          |     |                                  |                      |
|----|----------------------------|--------------------------------|--------------------------|-----|----------------------------------|----------------------|
| T1 | = 2.925194                 | ch;                            | 4.09161E <sup>-11</sup>  | sec | S.Dev = 1.318762E <sup>-12</sup> | sec                  |
| T2 | = 51.32418                 | ch;                            | 7.178961E <sup>-10</sup> | sec | S.Dev = 1.851417E <sup>-11</sup> | sec                  |
| A  | = 21.88275                 |                                |                          |     |                                  | S.Dev = 8.335311E-02 |
| B1 | = 0.4263506                | [ 90.82 Rel.Ampl][ 0.99 Alpha] |                          |     | S.Dev = 1.542918E <sup>-03</sup> |                      |
| B2 | = 2.456061E <sup>-03</sup> | [ 9.18 Rel.Ampl][ 0.01 Alpha]  |                          |     | S.Dev = 3.718652E <sup>-05</sup> |                      |

**Fig. S6** Life time decay of compound in a) Methanol, cyclohexane, benzene at (450 nm) b) Methanol, benzene & cyclohexane (550 nm) (c) Table showing the life time of compound d) life time decay data calculation.

$E_{\text{LUMO}} = -2.72 \text{ eV}$

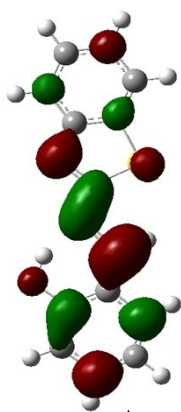

E

$\Delta E = 3.60 \text{ eV}$

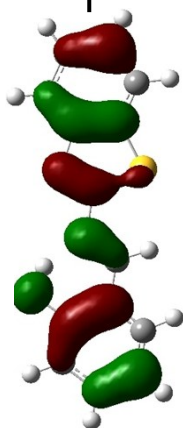

$E_{\text{HOMO}} = -6.32 \text{ eV}$

a) Enol form

$E_{\text{LUMO}} = -3.07 \text{ eV}$

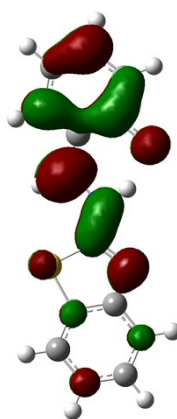

E

$\Delta E = 2.88 \text{ eV}$

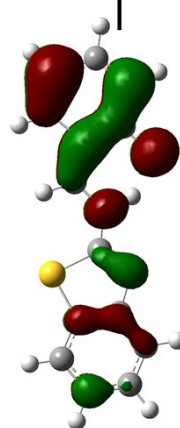

$E_{\text{HOMO}} = -5.95 \text{ eV}$

b) Keto form

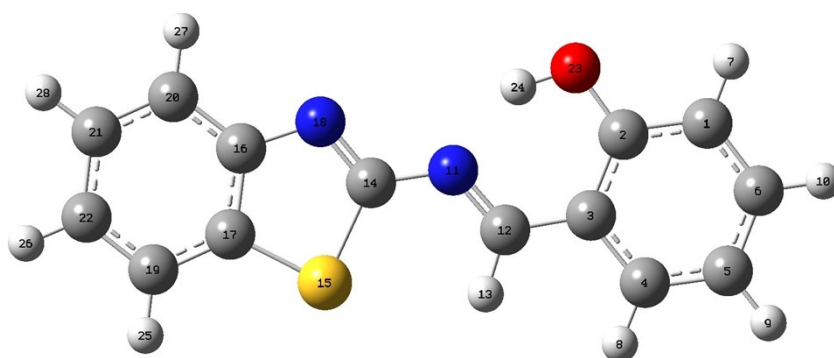

c) Labelled optimized structure of OM

**Fig. S7** Frontier molecular orbital image of HOMO and LUMO energy levels of a) compound enol form and b) OM keto c) Labelled optimized structure of OM form, calculated by using B3LYP/6-31+ G (d,P) as implemented on Gaussian 09.

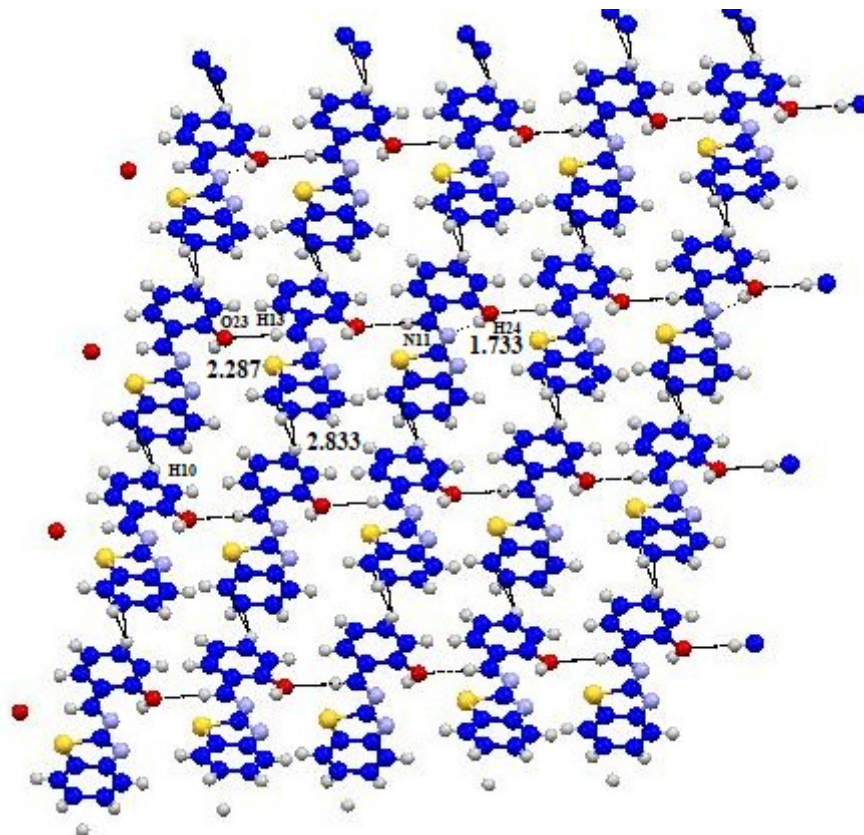

**Fig. S8** Packing diagram shows two short contacts of C-H...O and CH...  $\pi$  with 2.287 and 2.833 Å, respectively and a hydrogen bonding of N---H-O (1.733 Å)

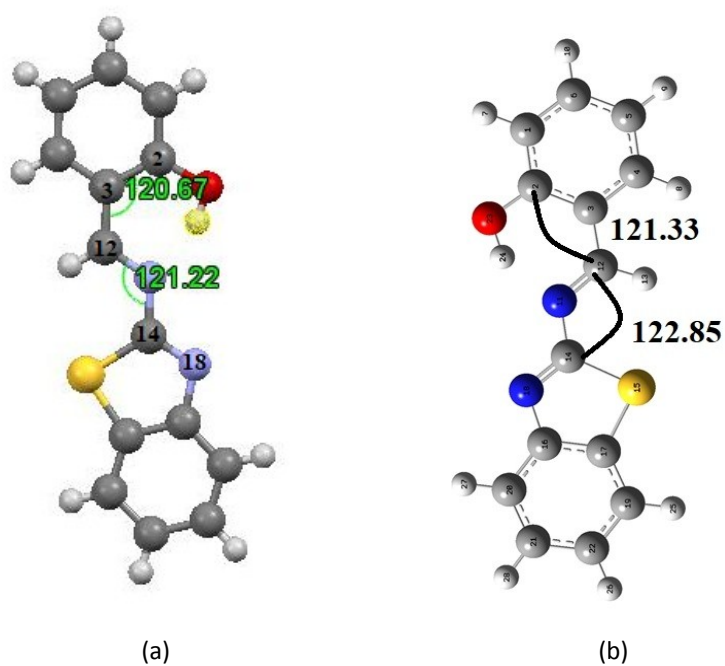

**Fig. S9** Comparison of angle between the crystal structure and calculation from DFT based modeling  
a) ORTEP Structure of compound showing different angle; b) calculated from DFT

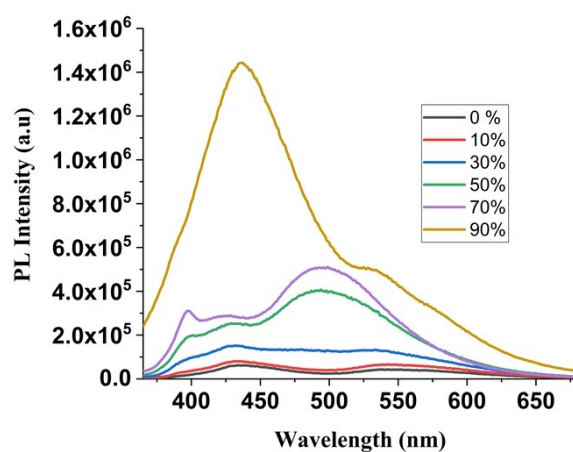

Fig. S10 Emission spectra of OM( $10^{-4}$  M) with increasing concentration of PEG (600)

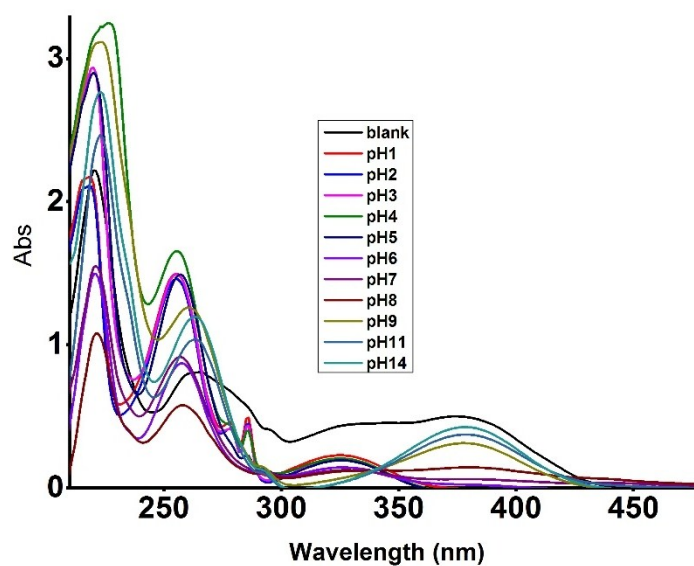

Fig. S11. Absorption spectra of compound (Methanol,  $10^{-3}$  M solution) in different pH buffer solution (Phosphate buffer solution).

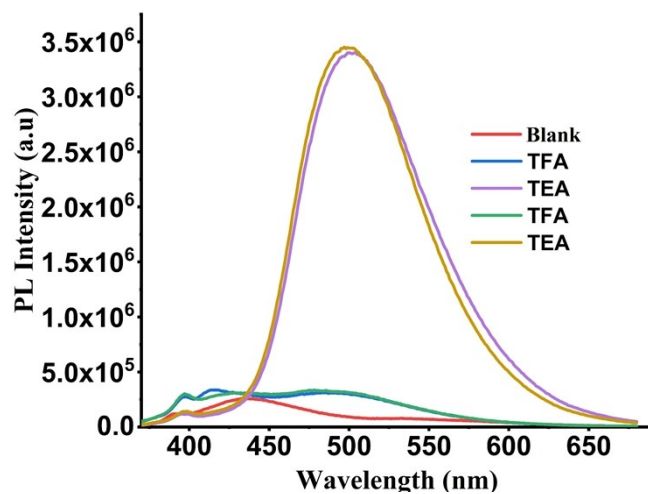

(a)



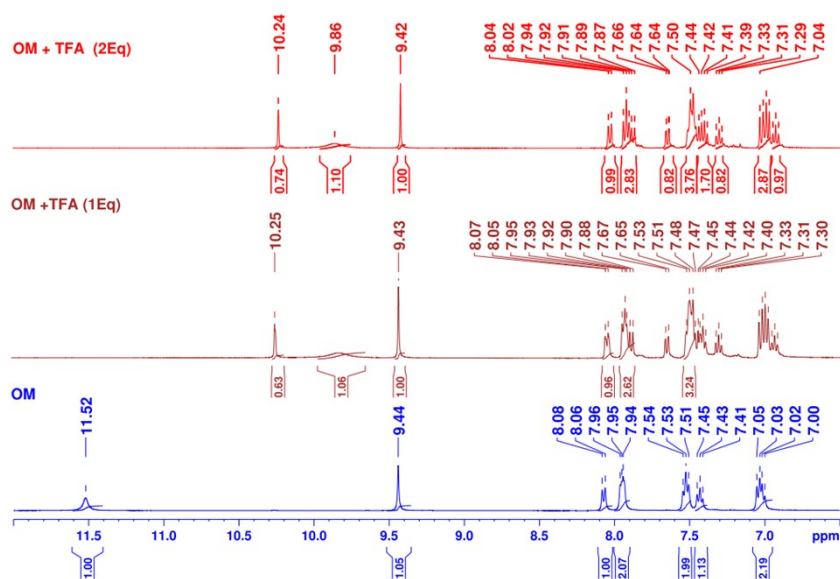

(b) <sup>1</sup>H NMR

**Fig. S12 (a)** Emission plot of OM ( $1 \times 10^{-4}$  M, MeOH) in presence of acid (trifluoroacetic acid, TFA) and base (triethylamine, TEA), (b) <sup>1</sup>H NMR of OM in presence of TFA trifluoroacetic acid

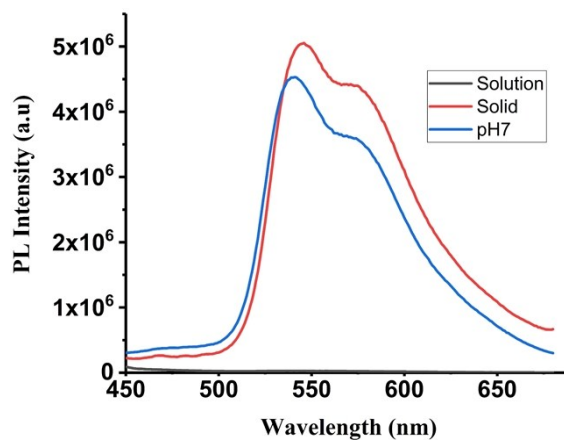

**Fig. S13** Comparing the emission spectra of OM in solid and in presence of pH 7

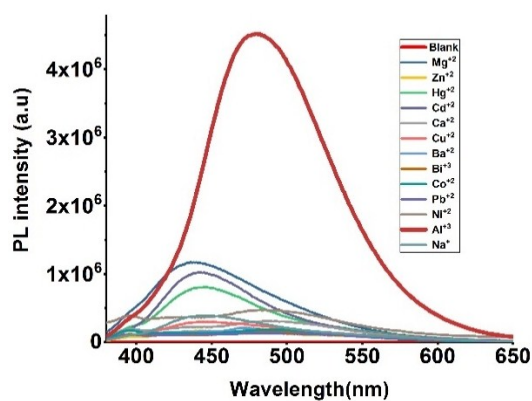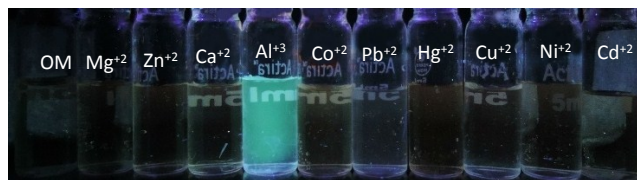

a)

b)

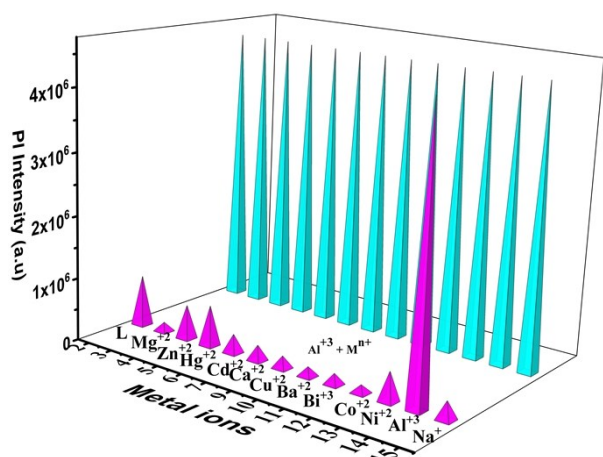

c)

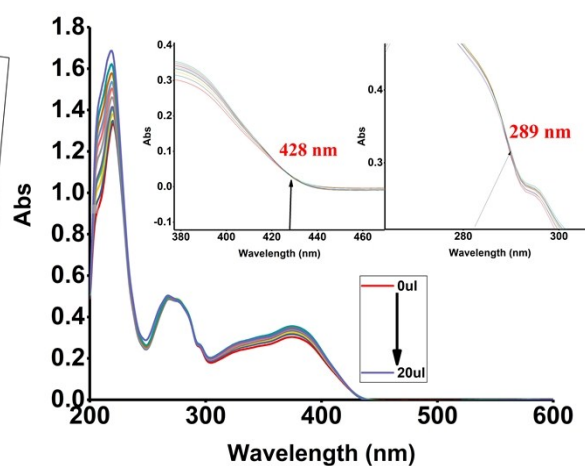

d)

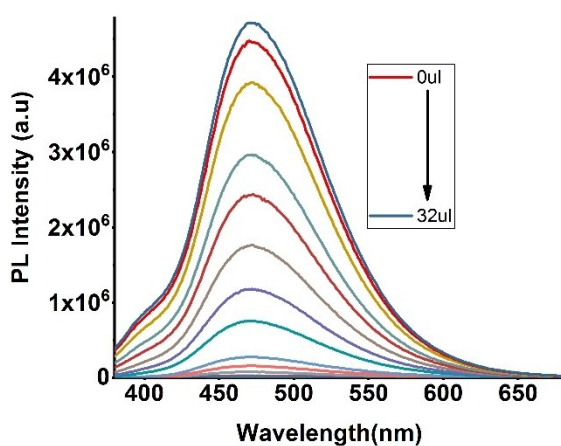

e)

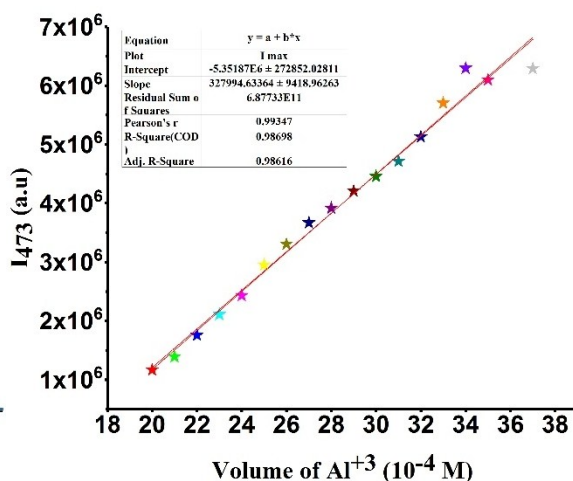

f)

**Fig. S14** a) PL spectra of compound with  $c = 10^{-4}$  M in methanol upon the addition of 1 equivalent of different metal ions;; (b) image of L ( $c = 10^{-4}$  M) with 1 equivalent of different metal ions, respectively; from left to right (under 356 nm UV lamp); (c) 3D column diagrams of the relative PL intensity of OM with different metal ions at  $I_{473}$ . Pink bars represent the addition of various metal ions to complex L and blue bars represents the subsequent addition of  $Al^{3+}$  (1 equivalent) to the above mentioned solutions [1 + different metal ions +  $Al^{3+}$ ]

(text in x-axis is not clear) (d) The absorption spectra of OM ( $1 \times 10^{-4}$  M) with gradual increase in the  $\text{Al}^{3+}$  ( $1 \times 10^{-4}$  M) concentration; (e) Emission spectra of compound ( $1 \times 10^{-4}$  M) titrated with different concentration of Aluminium nitrate; (f) Linear fitting of OM with the  $\text{Al}^{3+}$ .

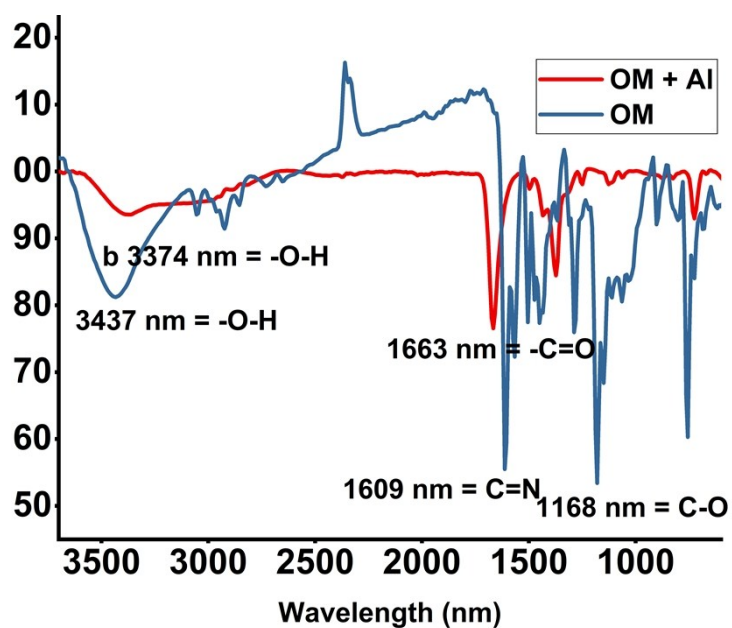

Fig. S15 IR spectra of compound in absence and presence of aluminum ion ( $\text{Al}^{3+}$ ).

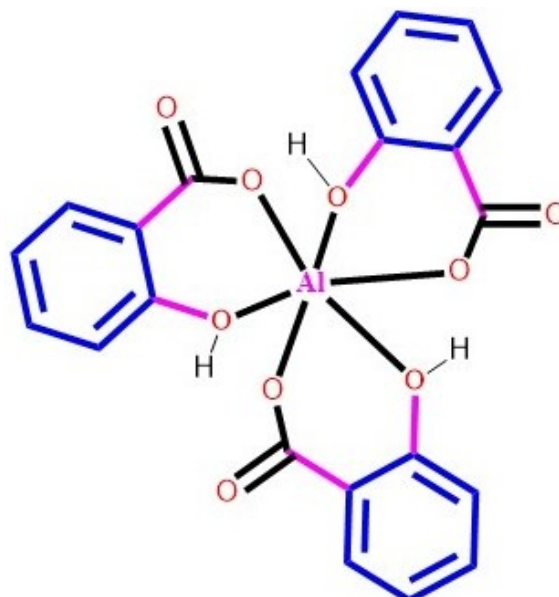

Fig. S16 Proposed structure

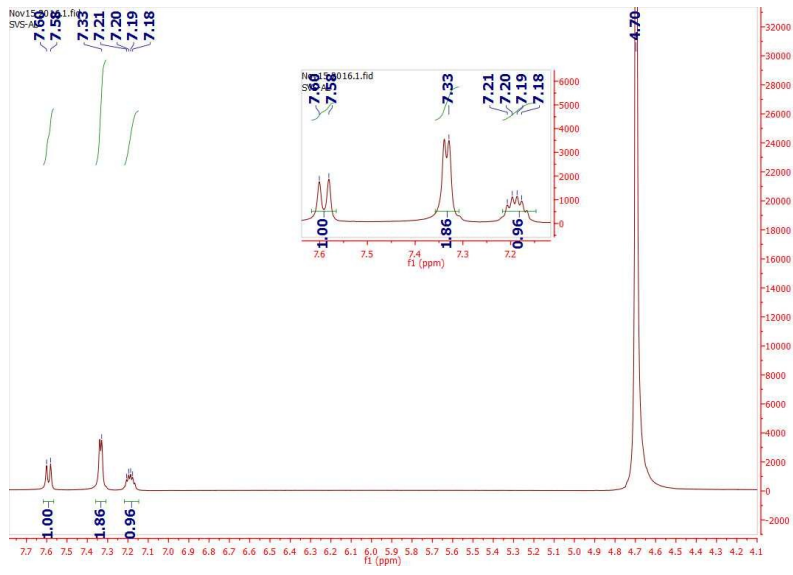

a)  $^1\text{H}$  of compound +  $\text{Al}^{3+}$

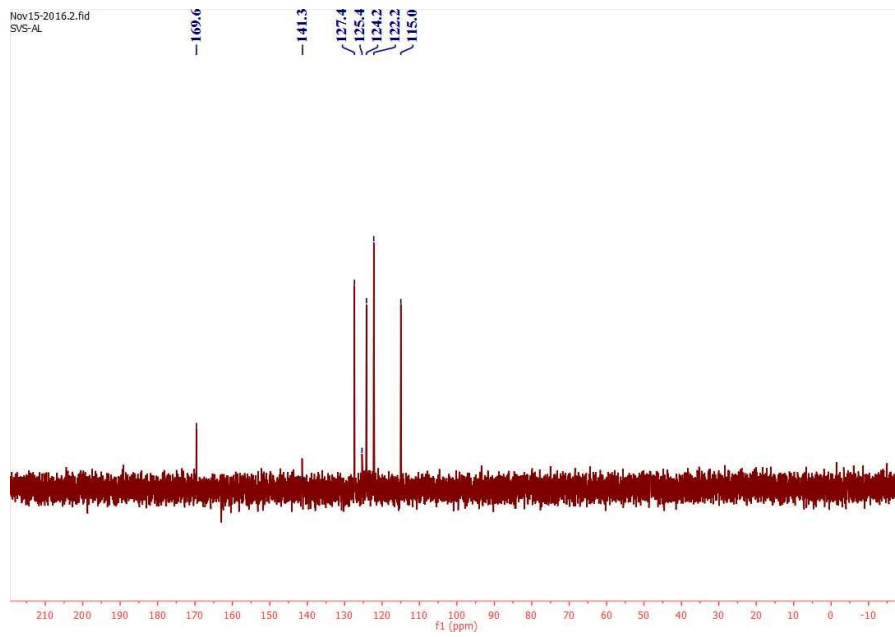

b)  $^{13}\text{C}$  of compound +  $\text{Al}^{3+}$

**Sample Name** S+LV+AL 1      **Position** P1-E1      **Instrument Name** Instrument 1      **User Name**  
**Inj Vol** 0.2      **InjPosition**      **SampleType** Sample      **IRM Calibration Status** Success  
**Data Filename** S+LV+AL 1.d      **ACQ Method** water\_acn\_grad\_6min\_      **Comment**      **Acquired Time** 8/29/2017 5:59:40 PM

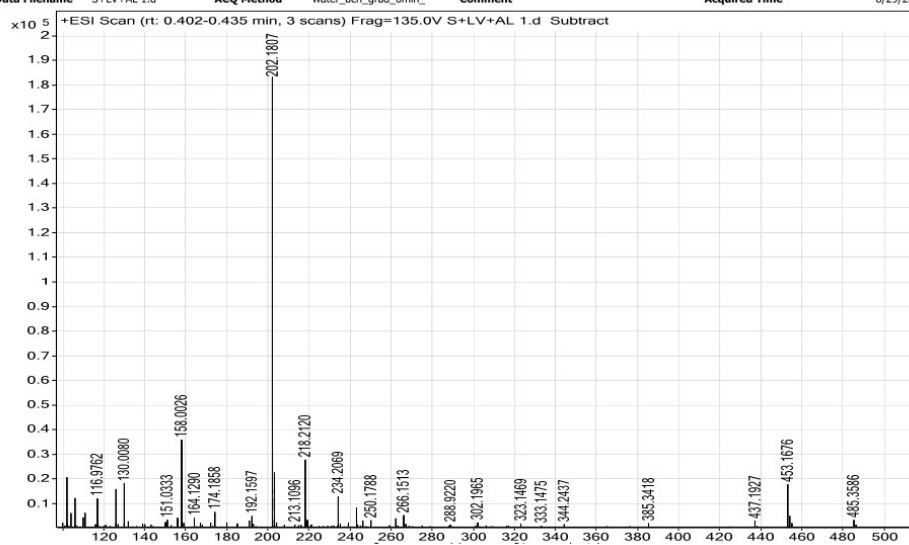

c)

**Fig. S17** <sup>1</sup>H, <sup>13</sup>C NMR and Mass spectra of complex compound + Al<sup>3+</sup>

**Table S1:** Vertical excitation energies calculated for lowest lying excited singlet states of the OM.

| States | Assignment          | $\Delta E$ | Wavelength | Oscillator strength |
|--------|---------------------|------------|------------|---------------------|
| S1     | HOMO – LUMO (95%)   | 3.1479 eV  | 393 nm     | 0.7535              |
| S2     | HOMO-1 – LUMO (86%) | 3.4825 eV  | 356 nm     | 0.0038              |
| S3     | HOMO-2 – LUMO (83%) | 3.6056 eV  | 343 nm     | 0.3717              |
| S4     | HOMO-4 – LUMO (93%) | 4.1272 eV  | 300 nm     | 0.0000              |

Table S2 Comparison of sensitivity of detection of Al<sup>3+</sup> (Literature reports vs present work).

| cc  | Reference                                                                     | Detection Limit in solution |
|-----|-------------------------------------------------------------------------------|-----------------------------|
| 1   | <i>Dalton Trans</i> , 2015, <b>44</b> , 18902-18910                           | 1.03 μM                     |
| 2   | <i>J Fluoresc</i> , 2016, <b>26</b> , 43–51                                   | 48 nM                       |
| 3.  | <i>Inorg. Chem</i> , 2016, <b>55</b> , 9212–9220                              | 0.5 nM                      |
| 4   | <i>Sens. Actuators, B</i> , 2017, <b>239</b> , 1194–1204                      | 0.461 μM                    |
| 5.  | <i>Anal. Chim. Acta</i> , 2017, <b>958</b> 38-50                              | 50 nM                       |
| 6.  | <i>J. Photochem. Photobiol. Chemistry</i> , 2017, <b>332</b> , <b>273–282</b> | 34 nM                       |
| 7.  | <i>Sens. Actuators, B</i> , 2017, <b>244</b> , 914–921                        | 3.6 μM                      |
| 8.  | <i>Dyes Pigm.</i> , 2017, <b>139</b> , 136-147                                | 9.24 μM                     |
| 9.  | <i>Chem. Commun</i> , 2014, <b>50</b> , 11833                                 | 2.08 μM                     |
| 10. | <i>Talanta</i> ,2018,178,796-804                                              | 26.7 nM                     |
| 11  | <i>NJC</i> <b>2018</b> doi 10.1039/c7nj03964f                                 | 2.4 nM                      |
| 12  | <i>J. Photochem. Photobiol</i> , <b>2018</b> , 353, 77-85                     | 5.7 nM                      |
| 13  | <i>Sens. Actuators, B</i> , <b>2018</b> ,255,366-373                          | 4.369 μM                    |
| 14  | <i>Present work</i>                                                           | 12 pM (456 ppt)             |
